# Supplementary material
Source: PubMed Central journal article supplement (PMC3326447)
Supplement: 1116897109_pnas.1116897109_SI.pdf [file 1116897109_pnas.1116897109_SI.pdf]

# Supporting Information

Jeon et al. 10.1073/pnas.1116897109

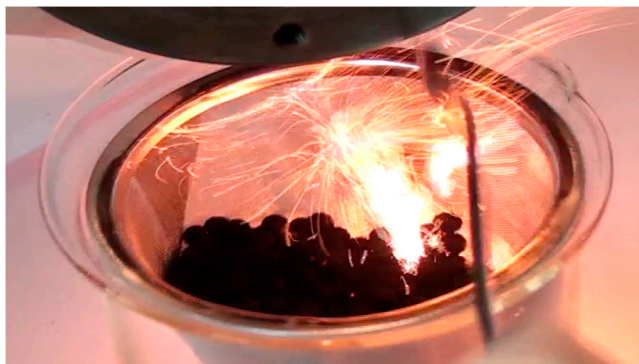

**Movie S1.** Video clip showing sparking while ball mill capsule is opening in air moisture.

[Movie S1 \(TIF\)](#)

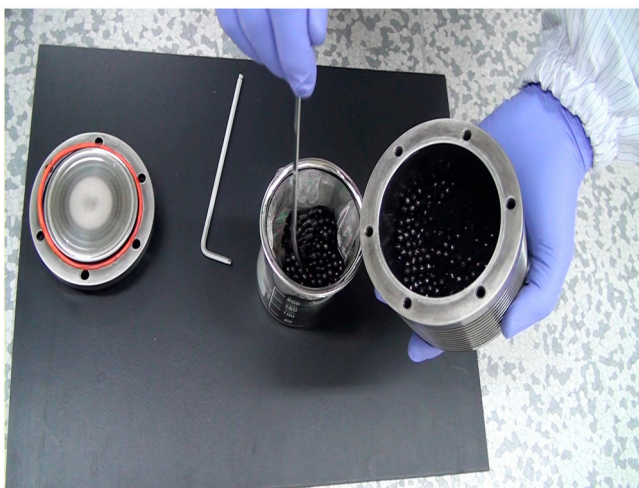

**Movie S2.** Video clip showing no sparking while ball mill capsule is opening in dry room (moisture level is less than 100 ppm).

[Movie S2 \(TIF\)](#)

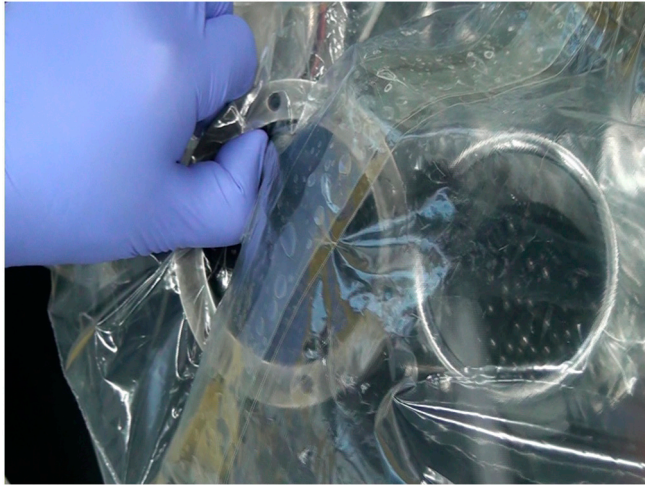

**Movie S3.** Video clip showing no sparkling while ball mill capsule is opening in vinyl bag containing nitrogen/moisture (80/20, v/v).

[Movie S3 \(TIF\)](#)
